# Supplementary material for: Laboratory and Field Evaluation of the Phytotoxic Activity of Sapindus mukorossi Gaertn Pulp Extract and Identification of a Phytotoxic Substance
Source: MDPI journal article supplement (doi:10.3390/molecules26051318), 2021-03-02

**Figure S1:** High-speed counter-current chromatography (HSCCC) spectrum of the 70% ethanol fraction. Peak of compound A is marked with red arrow.

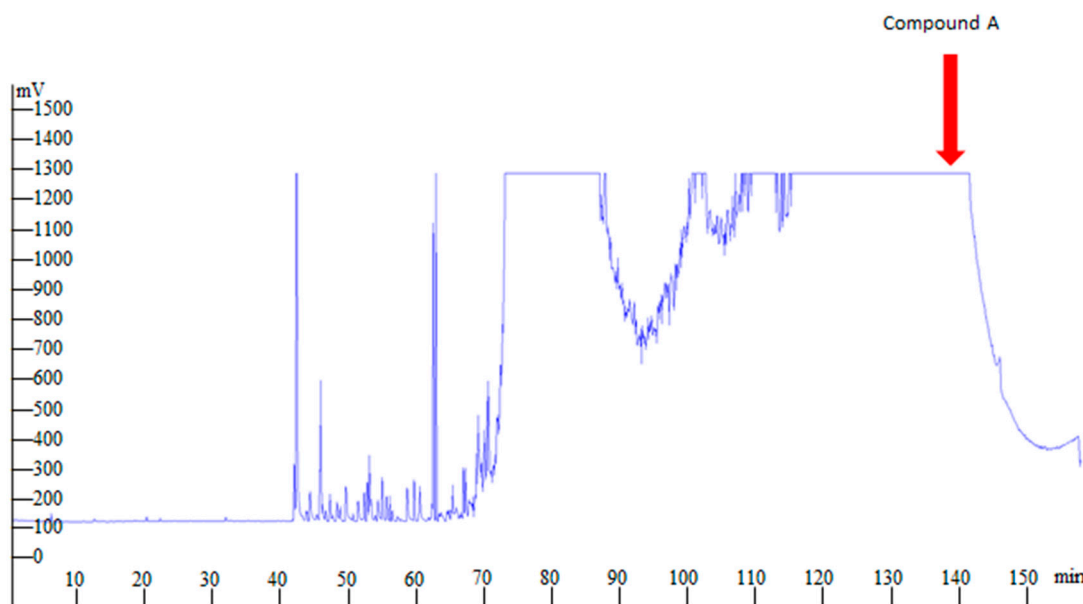

**Figure S2:** ESI-MS spectrum of compound A obtained by LC-QTOF/MS in the positive ion mode

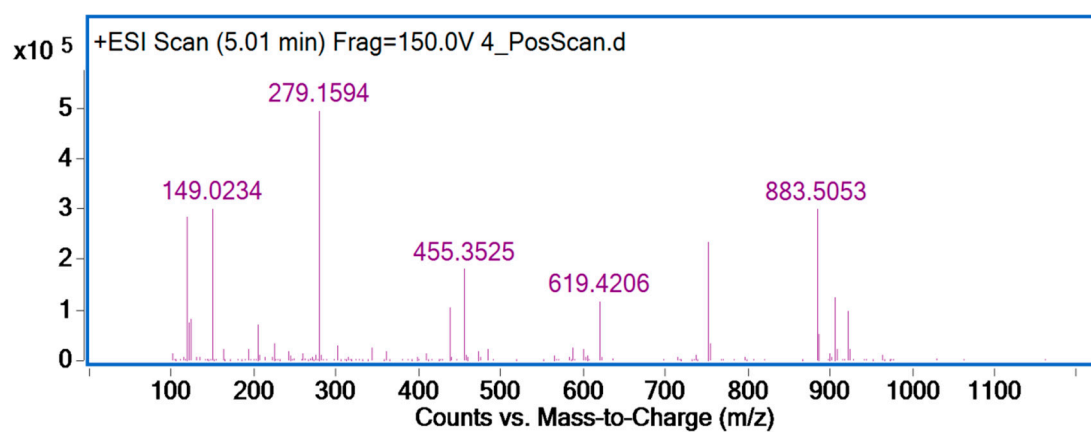

Supplement: s1 [file s1]
